# Supplementary material
Source: PubMed Central journal article supplement (PMC4327993)
Supplement: NIHMS618530-supplement-01.pdf [file NIHMS618530-supplement-01.pdf]

**Supplementary Table 1: ANOVA to examine sex differences across Global and Local metrics for LLD and HOA.**

|                  | <b>HOA (df=1,46)</b> |                   | <b>LLD (df=1,26)</b>             |                            |                               |                            |
|------------------|----------------------|-------------------|----------------------------------|----------------------------|-------------------------------|----------------------------|
| Gamma            | F=.534, p=.468       |                   | F=1.05, p=.315                   |                            |                               |                            |
| Lambda           | F=.368, p=.547       |                   | F=.072, p=.791                   |                            |                               |                            |
| Eglobal          | F=.338, p=.564       |                   | <b>F=7.04, p=.013 (M&gt;F)</b>   |                            |                               |                            |
|                  | <b>Right</b>         | <b>Left</b>       | <b>Right</b>                     |                            | <b>Left</b>                   |                            |
|                  | ANOVA                | ANOVA             | ANOVA                            | FDR                        | ANOVA                         | FDR                        |
| <b>PFC</b>       |                      |                   |                                  |                            |                               |                            |
| Centrality       | F=.561,<br>p=.458    | F=.219,<br>p=.642 | F=.581,<br>p=.453                |                            | F=.242,<br>p=.627             |                            |
| Path Length      | F=.591,<br>p=.446    | F=.464,<br>p=.499 | <b>F=16.02,<br/>p&lt;.001 **</b> | <b>q=.008<br/>(F&gt;M)</b> | <b>F=11.86,<br/>p=.002 **</b> | <b>q=.009<br/>(F&gt;M)</b> |
| Vulnerability    | F=.279,<br>p=.600    | F=.110,<br>p=.742 | F=.964,<br>p=.335                |                            | F=.422,<br>p=.521             |                            |
| <b>Cingulate</b> |                      |                   |                                  |                            |                               |                            |
| Centrality       | F=2.26,<br>p=.140    | F=.837,<br>p=.365 | <b>F=6.83,<br/>p=.015 *</b>      | <b>q=.039<br/>(M&gt;F)</b> | <b>F=6.82,<br/>p=.015 *</b>   | <b>q=.039<br/>(F&gt;M)</b> |
| Path Length      | F=.029,<br>p=.866    | F=1.80,<br>p=.186 | <b>F=12.03,<br/>p=.002 **</b>    | <b>q=.009<br/>(F&gt;M)</b> | <b>F=13.33,<br/>p=.001 **</b> | <b>q=.009<br/>(F&gt;M)</b> |
| Vulnerability    | F=1.26,<br>p=.268    | F=1.46,<br>p=.234 | <b>F=7.07,<br/>p=.013 *</b>      | <b>q=.039<br/>(F&gt;M)</b> | <b>F=4.74,<br/>p=.039 *</b>   | <b>q=.078<br/>(F&gt;M)</b> |
| <b>Temporal</b>  |                      |                   |                                  |                            |                               |                            |
| Centrality       | F=.003,<br>p=.957    | F=.750,<br>p=.391 | F=.197,<br>p=.661                |                            | F=.103,<br>p=.751             |                            |
| Path Length      | F=.024,<br>p=.877    | F=.127,<br>p=.723 | F=2.78,<br>p=.107                |                            | <b>F=5.55,<br/>p=.026 *</b>   | <b>q=.059<br/>(F&gt;M)</b> |
| Vulnerability    | F=.011,<br>p=.918    | F=1.26,<br>p=.268 | F=.617,<br>p=.439                |                            | F=.056,<br>p=.815             |                            |

Gamma=normalized clustering coefficient; Lambda=normalized path length; Eglobal=global efficiency.  
 \*significant at 5% level; \*\*significant at 1% level. Items in bold remain significant after FDR correction (q<.3).  
 FDR correction was applied to the 18 comparisons of local metrics for the HOA; and separately for the 18 comparisons of local metrics for the LLD group.

**Supplementary Table 2: Mean and Standard Deviations for Global Measures by Group: ANCOVA controlling for age and sex; Correlations with age controlling for sex.**

|         | Mean (SD)         |                   | ANCOVA (df=1,72) | ± Correlation with age controlling for sex |                 |
|---------|-------------------|-------------------|------------------|--------------------------------------------|-----------------|
|         | HOA               | LLD               |                  | HOA (df=45)                                | LLD (df=25)     |
| Gamma   | 2.37 (.252)       | 2.40 (.202)       | F=.213, p=.646   | r=.017, p=.912                             | r=.166, p=.409  |
| Lambda  | 1.22 (.152)       | 1.20 (.093)       | F=.038, p=.847   | r=.130, p=.385                             | r=.220, p=.271  |
| Eglobal | 138.68<br>(26.15) | 144.97<br>(41.46) | F=.322, p=.572   | r=-.151, p=.311                            | r=-.170, p=.395 |
| N       | 48                | 28                |                  |                                            |                 |

Gamma=normalized clustering coefficient; Lambda=normalized path length; Eglobal=global efficiency. ± Partial correlation controlling for sex.
